# Supplementary material for: Screening for Chagas Disease during Pregnancy in the United States—A Literature Review
Source: MDPI journal article supplement (doi:10.3390/tropicalmed6040202), 2021-11-26
Supplement: s1 [file s1]

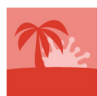

## Supplementary material of Screening for Chagas Disease during Pregnancy in the United States—A Literature Review

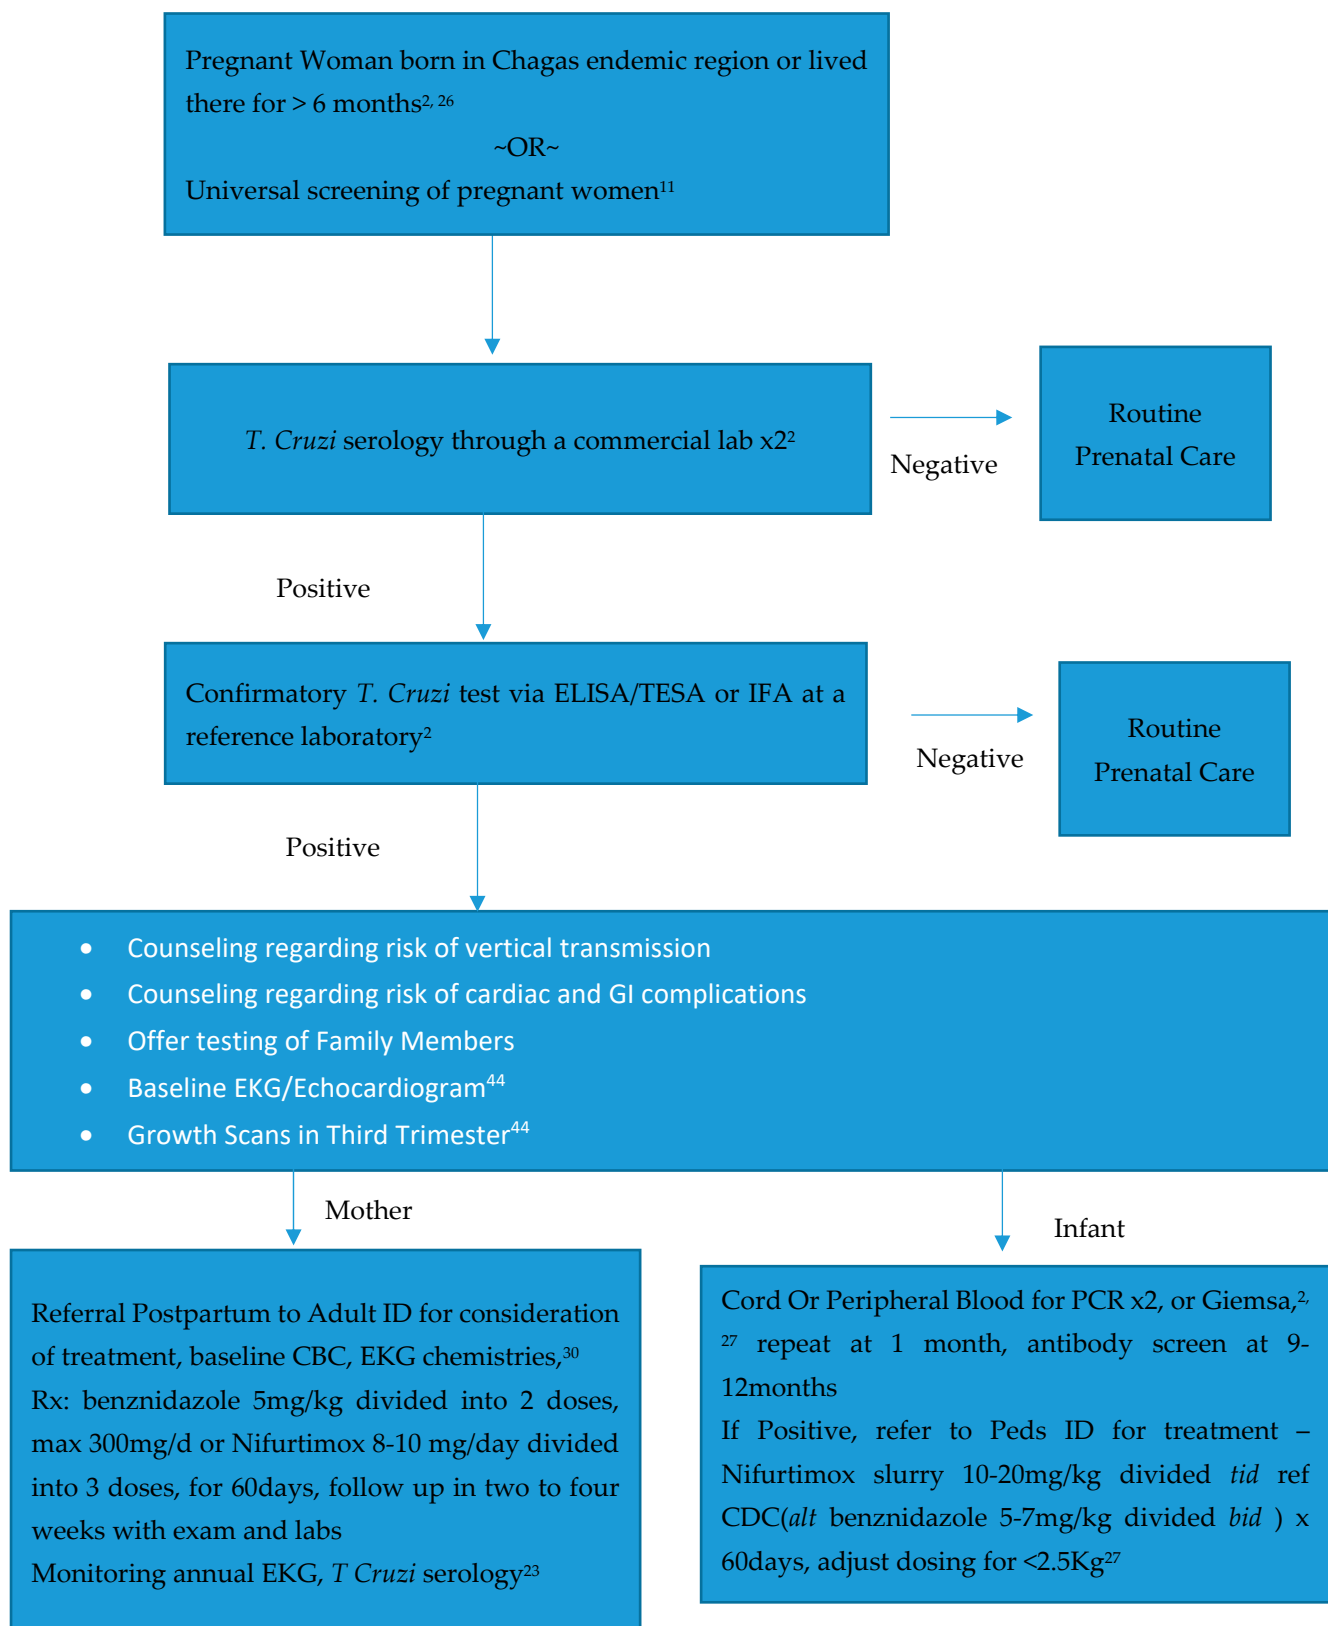

Figure S1. Proposal for Screening and Management of Chagas Disease in Pregnancy in the US.
